# Supplementary material for: Morphological response accompanying size reduction of belemnites during an Early Jurassic hyperthermal event modulated by life history
Source: PubMed Central journal article supplement (PMC8280180; doi:10.1038/s41598-021-93850-0), 2021-07-14
Supplement: 41598_2021_93850_MOESM1_ESM.pdf [file 41598_2021_93850_MOESM1_ESM.pdf]

Supplementary material to:

**Morphological response accompanying size reduction of  
belemnites during an Early Jurassic hyperthermal event  
modulated by life history**

Paulina S. Nätscher<sup>1\*</sup>, Guillaume Dera<sup>2</sup>, Carl J. Reddin<sup>3</sup>, Patrícia Rita<sup>4</sup>, Kenneth De Baets<sup>1</sup>

<sup>1</sup> Geozentrum Nordbayern, Friedrich-Alexander-Universität Erlangen-Nürnberg, Erlangen,  
Germany

<sup>2</sup> GET, Université Paul Sabatier, CNRS UMR 5563, IRD, Toulouse, France

<sup>3</sup> Museum für Naturkunde, Leibniz Institute for Evolution and Biodiversity Science, Berlin,  
Germany

<sup>4</sup> MARE (Marine and Environmental Sciences Centre), 3004-517 Coimbra, Portugal

\* Corresponding author

E-Mail address: paulina.naetscher@fau.de (PSN)

Table S1: p-values of differences in robustness between pairs of belemnite species represented in the dataset. Results were obtained by running an ANOVA and a consecutive Tukey post-hoc test.

| <b>ANOVA between species PC1</b>                                             | <b>diff</b> | <b>lower</b> | <b>upper</b> | <b>p</b> |     |
|------------------------------------------------------------------------------|-------------|--------------|--------------|----------|-----|
| <i>Bairstowius</i> sp. A- <i>Acrocoelites</i> sp.                            | -0.014      | -0.134       | 0.106        | 0.999    |     |
| <i>bisulcata</i> - <i>Acrocoelites</i> sp.                                   | 0.136       | 0.018        | 0.253        | 0.012    | *   |
| <i>Hastitidae</i> sp. indet.- <i>Acrocoelites</i> sp.                        | 0.054       | -0.094       | 0.201        | 0.952    |     |
| <i>longiformis</i> - <i>Acrocoelites</i> sp.                                 | 0.036       | -0.08        | 0.156        | 0.979    |     |
| <i>milleri</i> - <i>Acrocoelites</i> sp.                                     | 0.098       | -0.024       | 0.22         | 0.215    |     |
| <i>Parapassaloteuthis</i> aff. <i>zieteni</i> - <i>Acrocoelites</i> sp.      | 0.204       | 0.08         | 0.328        | < 0.0001 | *** |
| <i>Passaloteuthis</i> sp. juv.- <i>Acrocoelites</i> sp.                      | 0.134       | 0.007        | 0.262        | 0.032    | *   |
| <i>bisulcata</i> - <i>Bairstowius</i> sp. A                                  | 0.15        | 0.103        | 0.196        | < 0.0001 | *** |
| <i>Hastitidae</i> sp. indet.- <i>Bairstowius</i> sp. A                       | 0.068       | -0.033       | 0.168        | 0.442    |     |
| <i>longiformis</i> - <i>Bairstowius</i> sp. A                                | 0.05        | 0.006        | 0.094        | 0.014    | *   |
| <i>milleri</i> - <i>Bairstowius</i> sp. A                                    | 0.112       | 0.055        | 0.17         | < 0.0001 | *** |
| <i>Parapassaloteuthis</i> aff. <i>zieteni</i> - <i>Bairstowius</i> sp. A     | 0.218       | 0.156        | 0.28         | < 0.0001 | *** |
| <i>Passaloteuthis</i> sp. juv.- <i>Bairstowius</i> sp. A                     | 0.148       | 0.08         | 0.217        | < 0.0001 | *** |
| <i>Hastitidae</i> sp. indet.- <i>bisulcata</i>                               | -0.082      | -0.179       | 0.015        | 0.164    |     |
| <i>longiformis</i> - <i>bisulcata</i>                                        | -0.099      | -0.135       | -0.064       | < 0.0001 | *** |
| <i>milleri</i> - <i>bisulcata</i>                                            | -0.038      | -0.089       | 0.013        | 0.321    |     |
| <i>Parapassaloteuthis</i> aff. <i>zieteni</i> - <i>bisulcata</i>             | 0.069       | 0.013        | 0.124        | 0.006    | **  |
| <i>Passaloteuthis</i> sp. juv.- <i>bisulcata</i>                             | -0.001      | -0.065       | 0.062        | 1        |     |
| <i>longiformis</i> - <i>Hastitidae</i> sp. indet.                            | -0.017      | -0.113       | 0.078        | 0.999    |     |
| <i>milleri</i> - <i>Hastitidae</i> sp. indet.                                | 0.045       | -0.058       | 0.147        | 0.884    |     |
| <i>Parapassaloteuthis</i> aff. <i>zieteni</i> - <i>Hastitidae</i> sp. indet. | 0.151       | 0.045        | 0.256        | 0.001    | *** |
| <i>Passaloteuthis</i> sp. juv.- <i>Hastitidae</i> sp. indet.                 | 0.081       | -0.029       | 0.19         | 0.315    |     |
| <i>milleri</i> - <i>longiformis</i>                                          | 0.062       | 0.013        | 0.11         | 0.003    | **  |
| <i>Parapassaloteuthis</i> aff. <i>zieteni</i> - <i>longiformis</i>           | 0.168       | 0.114        | 0.221        | < 0.0001 | *** |
| <i>Passaloteuthis</i> sp. juv.- <i>longiformis</i>                           | 0.098       | 0.037        | 0.159        | < 0.0001 | *** |
| <i>Parapassaloteuthis</i> aff. <i>zieteni</i> - <i>milleri</i>               | 0.106       | 0.041        | 0.171        | < 0.0001 | *** |
| <i>Passaloteuthis</i> sp. juv.- <i>milleri</i>                               | 0.036       | -0.035       | 0.108        | 0.774    |     |
| <i>Passaloteuthis</i> sp. juv.- <i>Parapassaloteuthis</i> sp. 1              | -0.07       | -0.145       | 0.005        | 0.088    |     |

Table S2: Changes in GPA centroid size in *P. bisulcata*, *C. longiforma* and the full assemblage between consecutive ammonite subzones. Effect size is represented by Hedge's g and differences were tested for with Mann-Whitney U tests.

| <i>P.bisulcata</i>         | p       | W    | Hedges' g           | lower 95CI | upper 95CI | Sign. level |
|----------------------------|---------|------|---------------------|------------|------------|-------------|
| Sol.-Elis.                 | 0.845   | 55   | 0.029 (negligible)  | -0.841     | 0.899      |             |
| Elis.-Mir.                 | 0.604   | 52   | 0.415 (small)       | -0.521     | 1.351      |             |
| Mir.-Semic.                | 0.287   | 22   | 0.652 (medium)      | -0.721     | 2.025      |             |
| <b><i>C.longiforma</i></b> |         |      |                     |            |            |             |
| Elis.-Mir.                 | < 0.001 | 326  | 1.226 (large)       | 0.536      | 1.917      | ***         |
| Mir.-Semic.                | 0.015   | 53   | -1.02 (large)       | -1.799     | -0.24      | *           |
| <b>assemblage</b>          |         |      |                     |            |            |             |
| Sol.-Elis..                | 0.146   | 1108 | 0.368 (small)       | -0.062     | 0.799      |             |
| Elis.-Mir.                 | 0.018   | 1026 | 0.435 (small)       | -0.022     | 0.892      | *           |
| Mir.-Semic.                | 0.337   | 304  | -0.015 (negligible) | -0.556     | 0.527      |             |
| Semic.-Eleg.               | 0.006   | 0    | -6.302 (large)      | -8.586     | -4.018     | ***         |

Table S3: Changes in robustness (PC1) in *P. bisulcata*, *C. longiforma* and the full assemblage between consecutive ammonite subzones. Effect size is represented by Hedge's g and differences were tested for with Mann-Whitney U tests.

|                            |       |     |                     | lower  | upper  | Sign. |
|----------------------------|-------|-----|---------------------|--------|--------|-------|
| <i>P.bisulcata</i>         | p     | W   | Hedges' g           | 95CI   | 95CI   | level |
| Sol.-Elis.                 | 0.431 | 46  | -0.329 (small)      | -1.205 | 0.547  |       |
| Elis.-Mir.                 | 0.043 | 20  | -1.054 (large)      | -2.042 | -0.066 | *     |
| Mir.-Semic.                | 0.077 | 4   | -1.165 (large)      | -2.592 | 0.262  | .     |
| <b><i>C.longiforma</i></b> |       |     |                     |        |        |       |
| Elis.-Mir.                 | 0.02  | 111 | -0.845 (large)      | -1.506 | -0.183 | *     |
| Mir.-Semic.                | 0.592 | 124 | 0.229 (small)       | -0.508 | 0.966  |       |
| <b>assemblage</b>          |       |     |                     |        |        |       |
| Sol.-Elis.                 | 0.943 | 945 | -0.078 (negligible) | -0.506 | 0.349  |       |
| Elis.-Mir.                 | 0.107 | 612 | -0.335 (small)      | -0.79  | 0.12   |       |
| Mir.-Semic.                | 0.402 | 311 | -0.283 (small)      | -0.827 | 0.261  |       |
| Semic.-Eleg.               | 0.055 | 44  | 1.218 (large)       | -0.291 | 2.728  | .     |

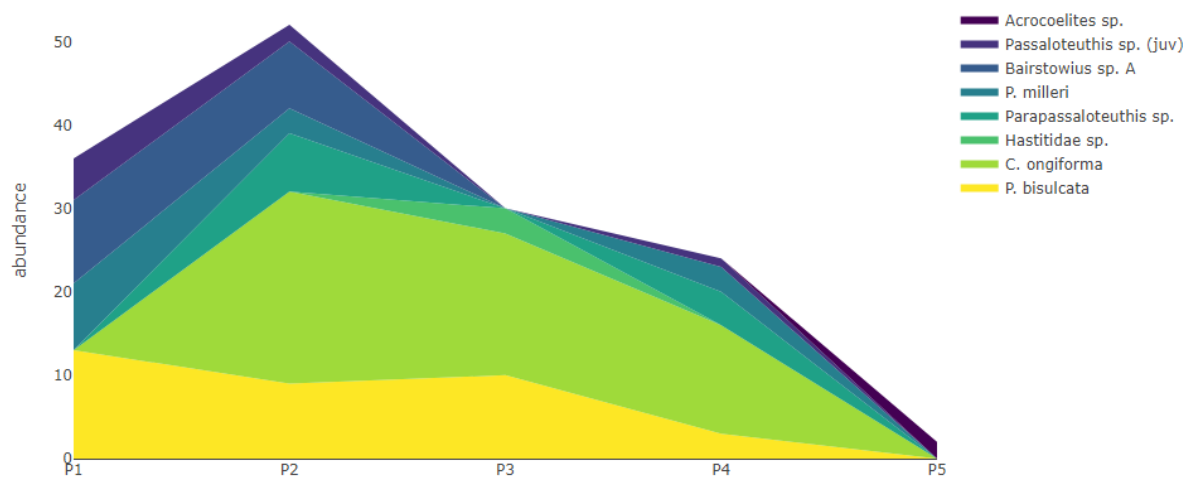

Figure S1: Absolute abundances of the taxa found in this study through the 5 subzones labelled "P1, P2, P3, P4, P5" here, corresponding to Solare, Elisa, Mirabile, Semicelatum, Elegantulum subzones in the manuscript

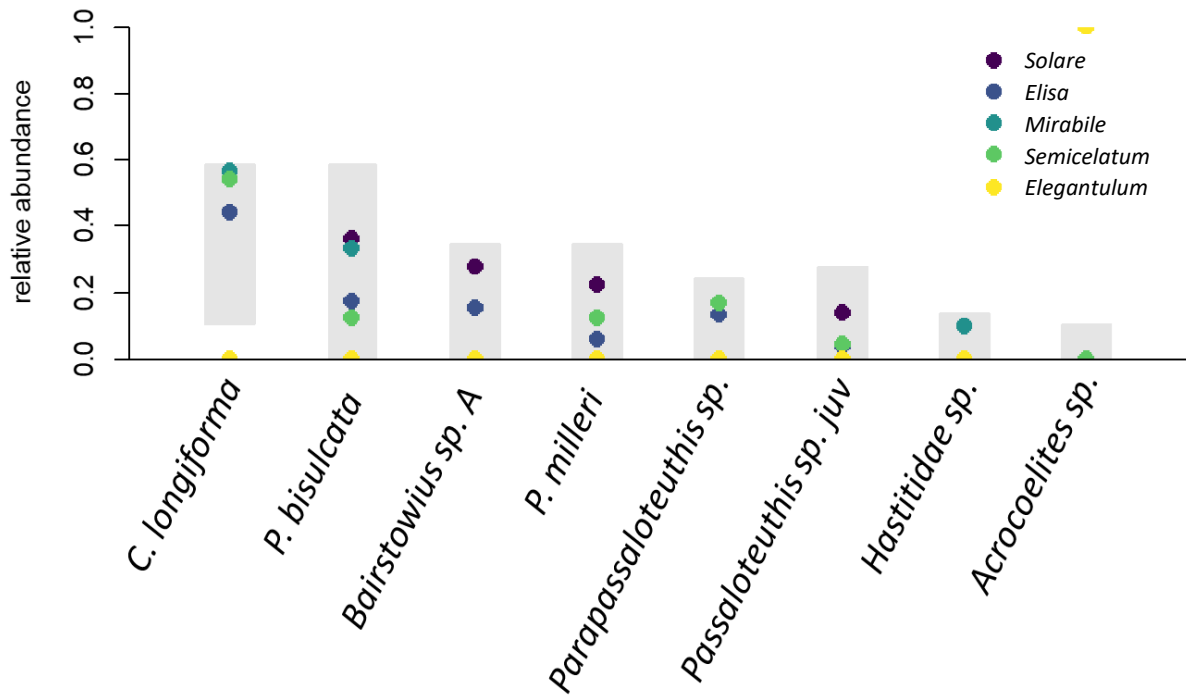

Figure S2: Results of the resampling method to determine non-randomness in changes of community composition over time. Grey rectangles represent the range within the relative abundance of a species in a specific bed is explainable by random sampling, n=29, 500 iterations

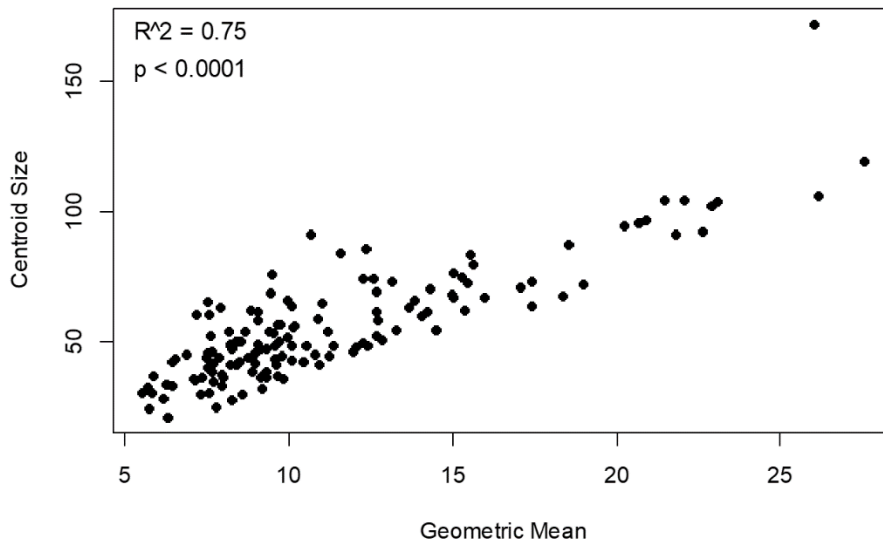

Figure S3: The geometric mean, which has been successfully used as a proxy for body size in previous studies, is highly correlated to centroid size, the size part in geometric morphometrics, which is used for scaling ( $R^2 = 0.75$ ,  $p < 0.0001$ ). Therefore, centroid size is used as a geometric morphometric body size proxy in this study.

Table S4: Linear regression models with developmental stage as an ordinal variable show that life stages do not play a significant role in the morphological variability in *P. bisulcata*. However, in *C. longiforma* developmental stage is a good predictor for morphological variation. Additionally, the linear model that includes life stage shows a more parsimonious fit than the null-model.

|                             | adj. R2 | p       | DF | AICc     |
|-----------------------------|---------|---------|----|----------|
| <b><i>P. bisulcata</i></b>  |         |         |    |          |
| with dev_stage              | 0.21    | 0.202   | 4  | 0.751    |
| no dev_stage                |         | 0.493   |    | -6.495   |
| <b><i>C. longiforma</i></b> |         |         |    |          |
| with dev_stage              | 0.078   | 0.024   | 51 | -173.386 |
| no dev_stage                |         | < 0.001 |    | -170.319 |



Table S5: The results of a Mood's median and post-hoc pairwise median test on the PC1 of both species (*C. longiforma* and *P. bisulcata*) among subzones, show a significant change in robustness in the pooled neanic and adult group across the boundary in *C. longiforma*. Juveniles in *P. bisulcata* change significantly through time, but changes across consecutive subzones are not significant.

|                             | p (Mood's) | X-squared | p (pairwiseMEDIAN adj.) | Hedges' g           |
|-----------------------------|------------|-----------|-------------------------|---------------------|
| <b><i>C. longiforma</i></b> |            |           |                         |                     |
| juveniles                   | 0.123      | 4.2       |                         |                     |
| Elis.-Mir.                  |            |           | 0.742                   | -0.374 (small)      |
| Mir.-Semic.                 |            |           | 0.777                   | -0.017 (negligible) |
| neanic&adult                | 0.064 .    | 5.512     |                         |                     |
| Elis.-Mir.                  |            |           | 0.054 .                 | -0.904 (large)      |
| Mir.-Semic.                 |            |           | 0.268                   | 0.337 (small)       |
| <b><i>P. bisulcata</i></b>  |            |           |                         |                     |
| juveniles                   | 0.005 **   | 10.5      |                         |                     |
| Sol.-Elis.                  |            |           | 0.527                   | NA                  |
| Elis.-Mir.                  |            |           | 0.575                   | NA                  |
| Mir.-Semic.                 |            |           | 1                       | -0.502 (medium)     |
| neanic&adult                | 0.929      | 0.148     |                         |                     |
| Sol.-Elis.                  |            |           | 0.902                   | 0.079 (negligible)  |
| Elis.-Mir.                  |            |           | 1                       | -0.478 (small)      |
| Mir.-Semic.                 |            |           | 0.635                   | NA                  |

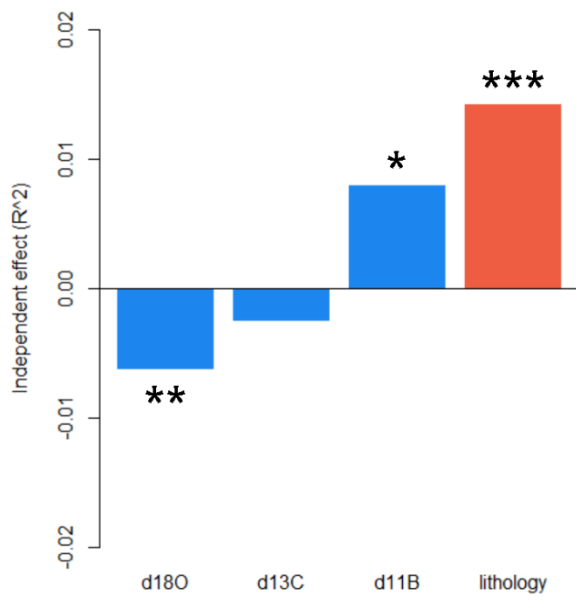

Figure S4: Independent effects of selected environmental and sedimentological parameters on the morphological variance among belemnite rostra. Significance indicated by asterix (See Table S6).

Table S6: Independent effects of  $\delta^{18}\text{O}$ ,  $\delta^{13}\text{C}$ ,  $\delta^{11}\text{B}$  and lithology on the morphological variance of the assemblage, quantified through variation partitioning. The adjusted  $R^2$  and p values were attained through a redundancy analysis.

|                       | <b>indep. effect</b> | <b>rda adj R<sup>2</sup></b> | <b>p</b> |    |
|-----------------------|----------------------|------------------------------|----------|----|
| $\delta^{18}\text{O}$ | -0.006               | 0.05                         | 0.005    | ** |
| $\delta^{13}\text{C}$ | -0.003               | -0.003                       | 0.484    |    |
| $\delta^{11}\text{B}$ | 0.008                | 0.025                        | 0.028    | *  |
| <b>lithology</b>      | 0.014                | 0.086                        | 0.002    | ** |

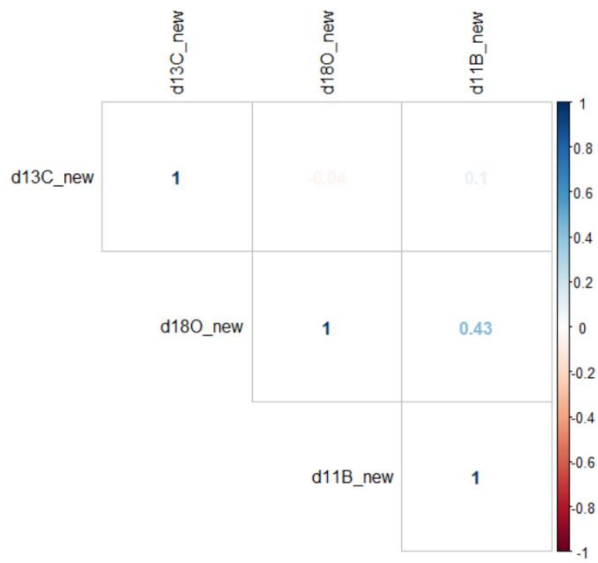

Figure S5: Plot of the correlation coefficients between the environmental parameters used in the gls models ( $\delta^{18}\text{O}$ ,  $\delta^{13}\text{C}$ , and  $\delta^{11}\text{B}$  extracted from Müller et al., 2020).

Table S7: AICc values of the different generalised least squares (gls) models describing the effects of palaeotemperature ( $\delta^{18}\text{O}$ ), carbon cycle perturbations ( $\delta^{13}\text{C}$ ) and seawater acidification ( $\delta^{11}\text{B}$ ) (all from Müller et al. 2020), on the belemnite robustness of the whole assemblage, *P. bisulcata* and *C. longiforma*, corrected for the effect of lithology. The lowest AICc score indicating the most parsimonious model for each of the groups is marked in yellow. For the entire assemblage the null-model is the most parsimonious. Morphological variations in *P. bisulcata* correlate best with boron isotopes as seawater pH proxy, while the full model with all environmental parameters ( $\delta^{18}\text{O}$ ,  $\delta^{13}\text{C}$  and  $\delta^{11}\text{B}$ ) is the best model for *C. longiforma*.

| assemblage                                                          | AICc            |
|---------------------------------------------------------------------|-----------------|
| ~ 1                                                                 | <b>-348.398</b> |
| ~ $\delta^{13}\text{C}$                                             | -346.706        |
| ~ $\delta^{18}\text{O}$                                             | -346.362        |
| ~ $\delta^{11}\text{B}$                                             | -341.428        |
| ~ $\delta^{13}\text{C} + \delta^{18}\text{O}$                       | -344.781        |
| ~ $\delta^{13}\text{C} + \delta^{11}\text{B}$                       | -339.84         |
| ~ $\delta^{18}\text{O} + \delta^{11}\text{B}$                       | -339.366        |
| ~ $\delta^{18}\text{O} + \delta^{13}\text{C} + \delta^{11}\text{B}$ | -337.693        |
| <b><i>P. bisulcata</i></b>                                          |                 |
| ~ 1                                                                 | -107.336        |
| ~ $\delta^{13}\text{C}$                                             | -105.537        |
| ~ $\delta^{18}\text{O}$                                             | -105.109        |
| ~ $\delta^{11}\text{B}$                                             | <b>-110.882</b> |
| ~ $\delta^{13}\text{C} + \delta^{18}\text{O}$                       | -103.288        |
| ~ $\delta^{13}\text{C} + \delta^{11}\text{B}$                       | -108.168        |
| ~ $\delta^{18}\text{O} + \delta^{11}\text{B}$                       | -109.09         |
| ~ $\delta^{18}\text{O} + \delta^{13}\text{C} + \delta^{11}\text{B}$ | -106.168        |
| <b><i>C. longiforma</i></b>                                         |                 |
| ~ 1                                                                 | -168.785        |
| ~ $\delta^{13}\text{C}$                                             | -166.516        |
| ~ $\delta^{18}\text{O}$                                             | -170.434        |
| ~ $\delta^{11}\text{B}$                                             | -167.615        |
| ~ $\delta^{13}\text{C} + \delta^{18}\text{O}$                       | -168.315        |
| ~ $\delta^{13}\text{C} + \delta^{11}\text{B}$                       | -166.885        |
| ~ $\delta^{18}\text{O} + \delta^{11}\text{B}$                       | -170.49         |
| ~ $\delta^{18}\text{O} + \delta^{13}\text{C} + \delta^{11}\text{B}$ | <b>-174.333</b> |

Table S8: Statistical parameters of the selected gls models comparing rostrum robustness with palaeotemperature ( $\delta^{18}\text{O}$ ), carbon cycle perturbations ( $\delta^{13}\text{C}$ ) and seawater acidification ( $\delta^{11}\text{B}$ ) (all from Müller et al. 2020), corrected for the effects of lithology. (SE = standard error, DF = degrees of freedom)

| <b>assemblage</b>                   | value   | SE    | t-value | p-value | DF  | residual | p (ANOVA best model vs null-model) |
|-------------------------------------|---------|-------|---------|---------|-----|----------|------------------------------------|
| <b>Residuals ~ 1</b><br>(intercept) | -0.0003 | 0.001 | -0.034  | -0.034  | 144 | 143      | -                                  |
| <b><i>P. bisulcata</i></b>          |         |       |         |         | 35  | 33       | 0.014                              |
| intercept                           | 2.329   | 0.742 | 3.137   | 0.004   |     |          |                                    |
| Residuals ~ $\delta^{11}\text{B}$   | -0.16   | 0.052 | -3.055  | 0.004   |     |          |                                    |
| <b><i>C. longiforma</i></b>         |         |       |         |         | 53  | 49       | 0.005                              |
| intercept                           | 1.421   | 0.435 | 3.263   | 0.002   |     |          |                                    |
| Residuals ~ $\delta^{18}\text{O}$   | 0.116   | 0.034 | 3.428   | 0.001   |     |          |                                    |
| Residuals ~ $\delta^{13}\text{C}$   | -0.026  | 0.01  | -2.655  | 0.011   |     |          |                                    |
| Residuals ~ $\delta^{11}\text{B}$   | -0.093  | 0.029 | -3.195  | 0.002   |     |          |                                    |

Table S9: AICc values of the different generalised least squares (gls) models describing the effects of palaeotemperature ( $\delta^{18}\text{O}$ ) (Suan et al. 2008), carbon cycle perturbations ( $\delta^{13}\text{C}$ ) (Hesselbo et al., 2007) and volcanism (Hg/TOC) (Percival et al., 2015), on the belemnite robustness of the whole assemblage, *P. bisulcata* and *C. longiforma*, corrected for the effect of lithology. The lowest AICc score, and therefore most parsimonious model, for each of the groups is marked in yellow. For the entire assemblage and *P. bisulcata*, the null-model is the most parsimonious, while the full model with all environmental parameters ( $\delta^{18}\text{O}$ ,  $\delta^{13}\text{C}$  and Hg/TOC) is the best model for *C. longiforma*.

| assemblage                                                    | AICc            |
|---------------------------------------------------------------|-----------------|
| ~ 1                                                           | <b>-348.398</b> |
| ~ $\delta^{13}\text{C}$                                       | -346.765        |
| ~ $\delta^{18}\text{O}$                                       | -346.29         |
| ~ Hg/TOC                                                      | -276.394        |
| ~ $\delta^{13}\text{C} + \delta^{18}\text{O}$                 | -344.625        |
| ~ $\delta^{13}\text{C} + \text{Hg/TOC}$                       | -274.214        |
| ~ $\delta^{18}\text{O} + \text{Hg/TOC}$                       | -274.23         |
| ~ $\delta^{18}\text{O} + \delta^{13}\text{C} + \text{Hg/TOC}$ | -272.014        |
| <b><i>P. bisulcata</i></b>                                    |                 |
| ~ 1                                                           | <b>-107.336</b> |
| ~ $\delta^{13}\text{C}$                                       | -105.839        |
| ~ $\delta^{18}\text{O}$                                       | -107.046        |
| ~ Hg.TOC                                                      | -81.645         |
| ~ $\delta^{13}\text{C} + \delta^{18}\text{O}$                 | -104.32         |
| ~ $\delta^{13}\text{C} + \text{Hg/TOC}$                       | -79.156         |
| ~ $\delta^{18}\text{O} + \text{Hg/TOC}$                       | -79.619         |
| ~ $\delta^{18}\text{O} + \delta^{13}\text{C} + \text{Hg/TOC}$ | -76.373         |
| <b><i>C. longiforma</i></b>                                   |                 |
| ~ 1                                                           | -168.785        |
| ~ $\delta^{13}\text{C}$                                       | -166.725        |
| ~ $\delta^{18}\text{O}$                                       | -166.97         |
| ~ Hg.TOC                                                      | -170.407        |
| ~ $\delta^{13}\text{C} + \delta^{18}\text{O}$                 | -165.113        |
| ~ $\delta^{13}\text{C} + \text{Hg/TOC}$                       | -167.976        |
| ~ $\delta^{18}\text{O} + \text{Hg/TOC}$                       | -169.551        |
| ~ $\delta^{18}\text{O} + \delta^{13}\text{C} + \text{Hg/TOC}$ | <b>-173.74</b>  |

Table S10: Statistical parameters of the selected gls models comparing rostrum robustness with palaeotemperature ( $\delta^{18}\text{O}$ ) (Suan et al. 2008), carbon cycle perturbations ( $\delta^{13}\text{C}$ ) (Hesselbo et al. 2007) and volcanism (Hg/TOC) (Percival et al. 2015), corrected for the effects of lithology. (SE = standard error, DF = degrees of freedom)

| <b>assemblage</b>                 | value   | SE    | t-value | p-value | DF  | residual | p<br>(ANOVA<br>best<br>model vs<br>null-<br>model) |
|-----------------------------------|---------|-------|---------|---------|-----|----------|----------------------------------------------------|
| Residuals ~ 1 (intercept)         | -0.0003 | 0.001 | -0.034  | 0.973   | 144 | 143      | -                                                  |
| <b>P. bisulcata</b>               |         |       |         |         |     |          |                                                    |
| Residuals ~ 1 (intercept)         | 0.062   | 0.018 | 3.529   | 0.001   | 35  | 34       | -                                                  |
| <b>C. longiforma</b>              |         |       |         |         |     |          |                                                    |
| intercept                         | 0.114   | 0.062 | 1.834   | 0.073   | 53  | 49       | 0.007                                              |
| Residuals ~ $\delta^{18}\text{O}$ | 0.255   | 0.084 | 3.033   | 0.004   |     |          |                                                    |
| Residuals ~ $\delta^{13}\text{C}$ | 0.05    | 0.018 | 2.724   | 0.009   |     |          |                                                    |
| Residuals ~ Hg/TOC                | 0.365   | 0.101 | 3.626   | 0.001   |     |          |                                                    |
